# Supplementary material
Source: publisher figshare collection journal article supplement (https://acs.figshare.com/ndownloader/files/26078568)
Supplement: Supplementary file 1 [file 26078568]

## Supporting Information

### Naphthaquinone-based Composite Cathodes for Aqueous Rechargeable Zinc-ion Batteries

James Kumankuma-Sarpong, Shuai Tang, Wei Guo, and Yongzhu Fu\*

*College of Chemistry, Zhengzhou University, Zhengzhou 450001, P. R. China*

\*Corresponding author

E-mail addresses: yfu@zzu.edu.cn (Y. Fu)

#### Supporting figures:

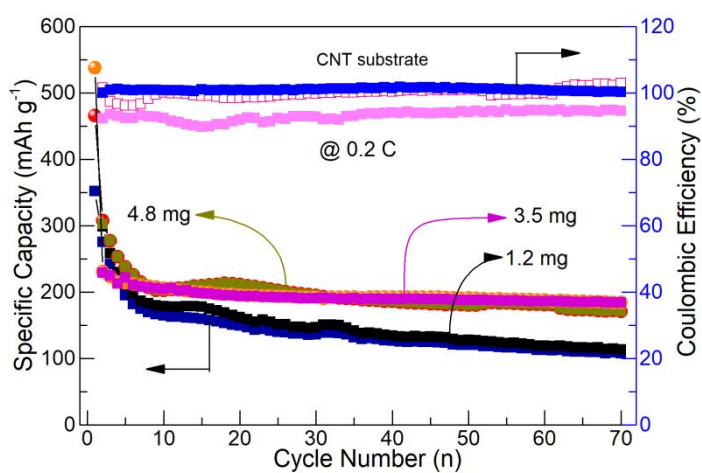

**Figure S1.** Electrochemical performance optimization with different mass loadings.

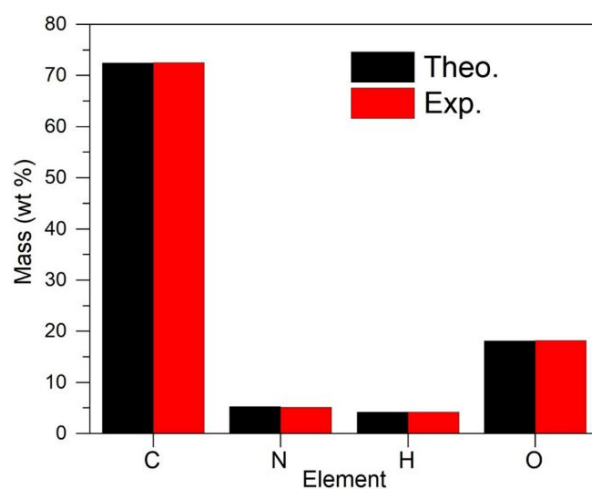

**Figure S2.** Elemental analysis of the as-synthesized APh-NQ.

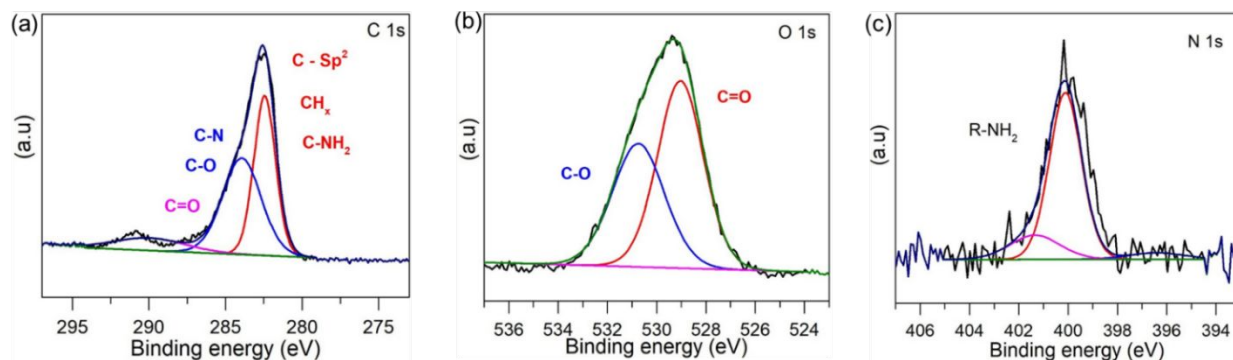

**Figure S3.** High-resolution X-ray photoelectron spectroscopy (XPS) spectra of pristine APh-NQ. (a) C 1s, (b) O 1s, and (c) N 1s.

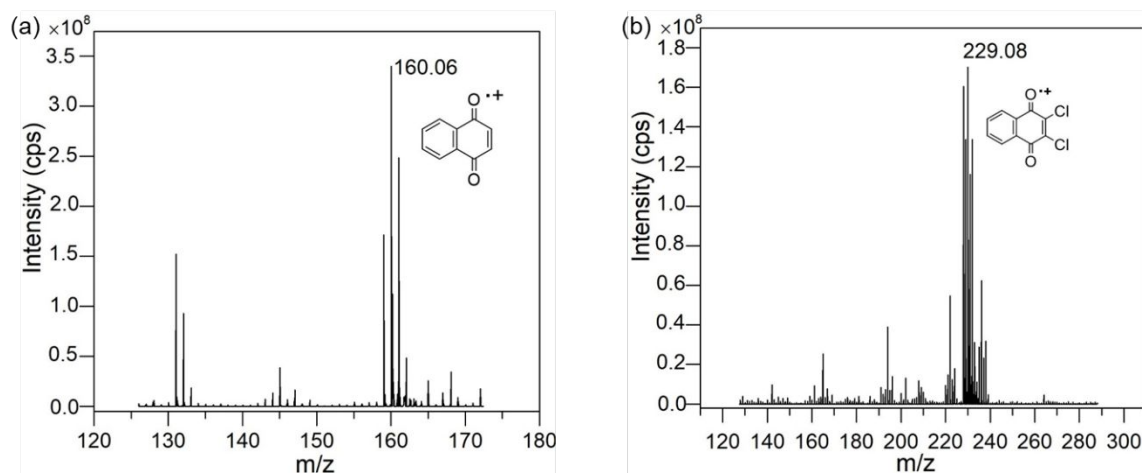

**Figure S4.** MS of (a) NQ and (b) dichlorone of UPLC-QToF-MS analysis extracted from the cycled electrodes.

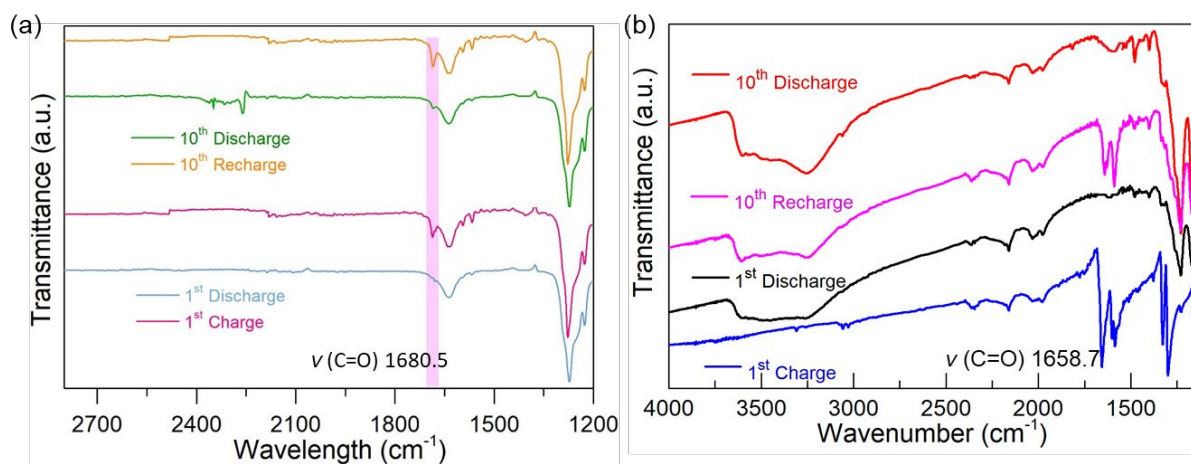

**Figure S5.** FTIR spectra of (a) dichlone and (b) NQ at 1<sup>st</sup> and 10<sup>th</sup> discharge/recharged state at complete discharge/charge voltage at 0.1 V and 1.7 V, respectively

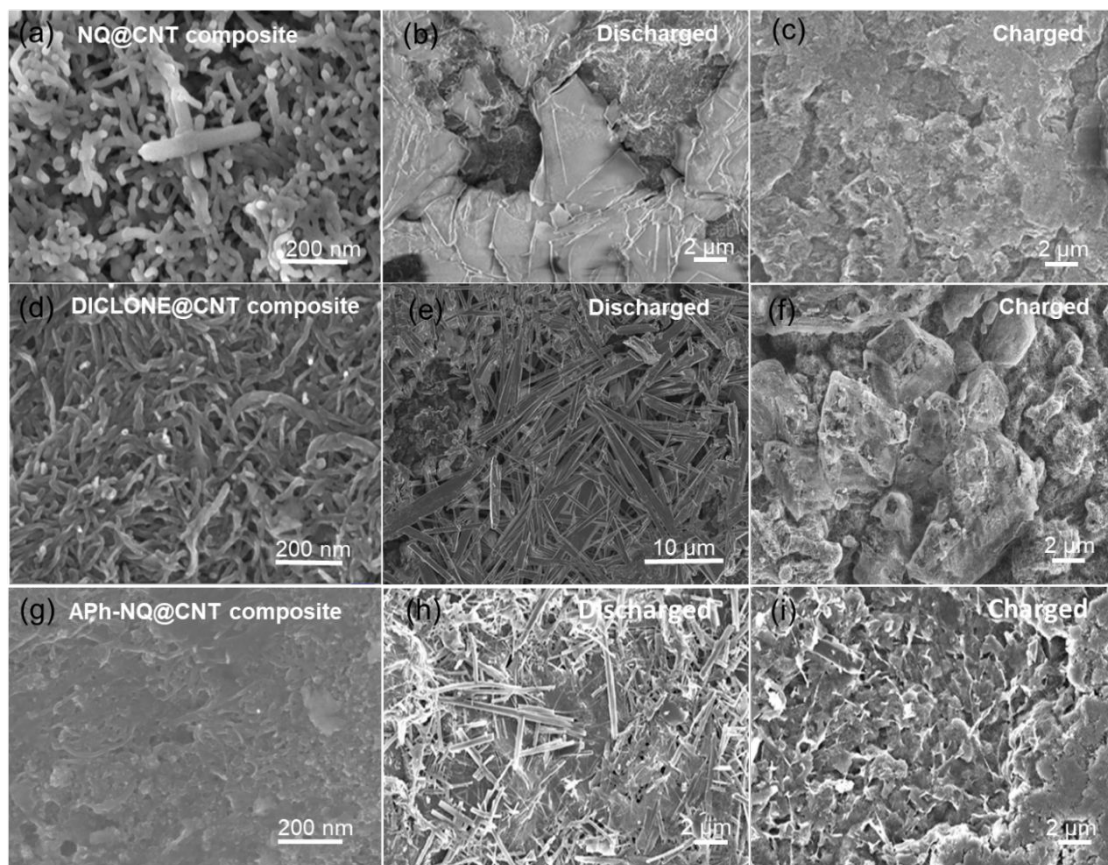

**Figure S6.** Typical SEM images of NQ@CNT at (a) pristine, (b) discharged, (c) charged states, dichlone@CNT at (d) pristine, (e) discharged, (f) charged states, and APh-NQ@CNT at (g) pristine, (h) discharged, (i) charged states.

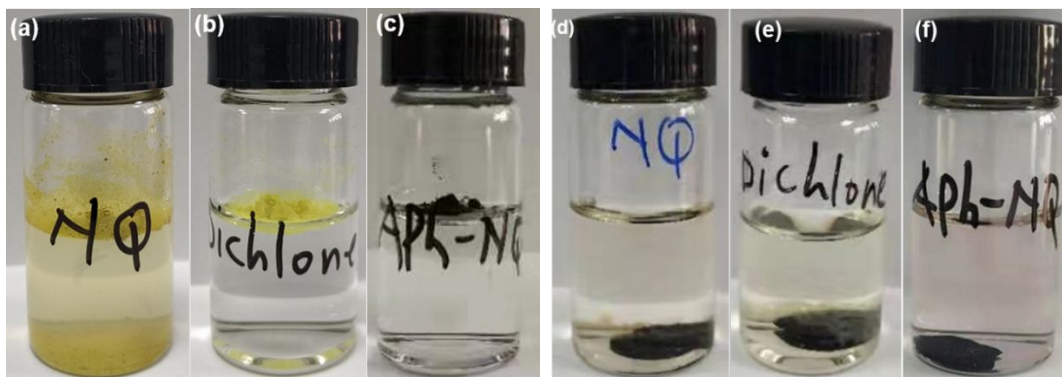

**Figure S7.** Digital photos of dissolution test of pristine samples (a) NQ, (b) dichlone, and (c) APh-NQ and cycled-composite electrodes (d) NQ@CNT, (e) dichlone@CNT, and (f) APh-NQ@CNT, which show faintly colored electrolyte after one week storage.

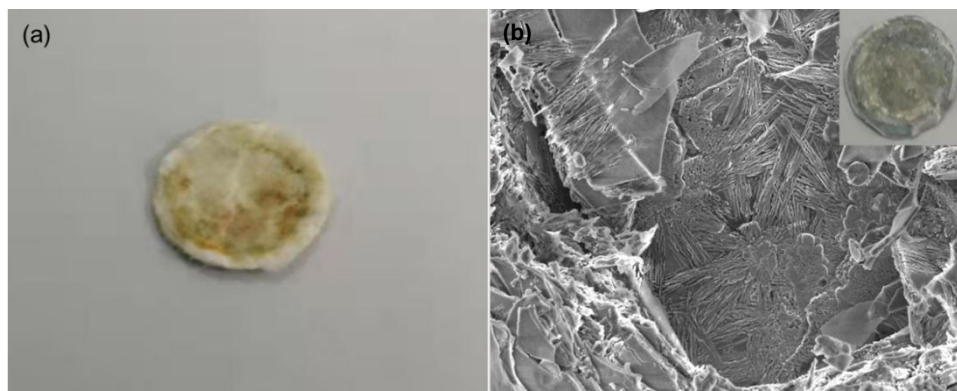

**Figure S8.** Digital photo of glass fiber separator (a) and the SEM image of (b) zinc anode after long cycles, the inset is the photo of the zinc anode.
